# Supplementary material for: Post-transcriptional regulation of photosynthetic genes is a key driver of C4 leaf ontogeny
Source: PubMed Central journal article supplement (PMC5853474; doi:10.1093/jxb/erw386), 2016-10-18
Supplement: erw386_suppl_supplementary_figure_s1.pdf [file erw386_suppl_supplementary_figure_s1.pdf]

**A. C<sub>4</sub> cycle genes**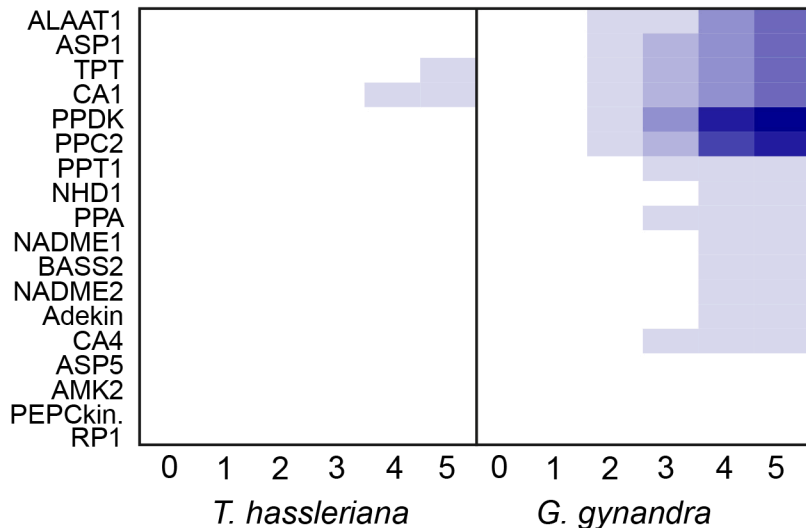**B. Calvin-Benson cycle genes**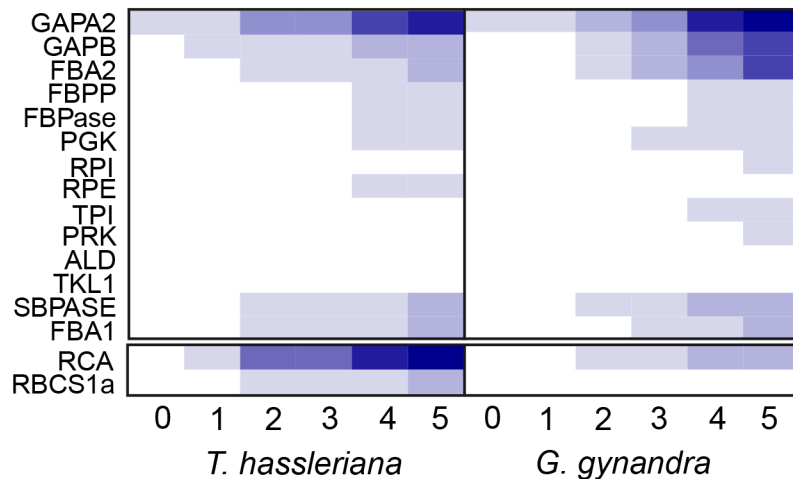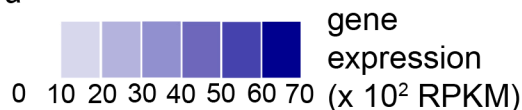

**Supplementary Fig. 1.** Gene expression profiles in leaf gradient of *T. hassleriana* and *G. gynandra* for (A) C<sub>4</sub> cycle genes and (B) the Calvin Benson cycle. Expression values were extracted from K $\ddot{u}$ lahoglu et al. (K $\ddot{u}$ lahoglu et al., 2014) and expressed in reads per kilobase per million mapped reads (RPKM). Stages 0 to 5 represent leaf stage at different age, from the younger to the older. For the EISA analysis, only the extreme stages 0 and 5 of the gradient were taken into consideration.
